# Supplementary material for: METTL3 Promotes Lung Adenocarcinoma Tumorigenesis and Inhibits Ferroptosis by Stabilizing SLC7A11 m6A Modification
Source: Research Square preprint supplement (doi:10.21203/rs.3.rs-1085921/v1), 2021-11-23
Supplement: Supplementary file [file 434852e503c761d76aa31749.pdf]

**Table S1 The sequence of primers for qPCR**

| <b>Primer</b>    | <b>Sequence</b>         |
|------------------|-------------------------|
| $\beta$ -actin-F | CATGTACGTTGCTATCCAGGC   |
| $\beta$ -actin-F | CTCCTTAATGTCACGCACGAT   |
| METTL3-F         | TTGTCTCCAACCTTCCGTAGT   |
| METTL3-R         | CCAGATCAGAGAGGTGGTGTAG  |
| SLC7A11-F        | CGTCCTTTCAAGGTGCCACT    |
| SLC7A11-R        | GGCAGATTGCCAAGATCTCAAG  |
| YTHDF1-F         | ACCTGTCCAGCTATTACCCG    |
| YTHDF1-R         | TGGTGAGGTATGGAATCGGAG   |
| P2RY11-F         | AGCTCCTATGTGCCCTACCA    |
| P2RY11-R         | GCGGCCATGTAGAGTAGAGG    |
| LACC1-F          | GTGTTGCTATGGCTACAGTGAA  |
| LACC1-F          | GTCCTACTGAAGGTCCAAGTACA |
| ZDBF2-F          | CAAGGATATTGCAGTTATTGCCG |
| ZDBF2-R          | AGACGATGACCCAGTATTCACAT |
| S1PR3-F          | GGATGTGCTGGCTCATTGC     |
| S1PR3-R          | CAGGATGGTAGAGCAGTCAGG   |
| CSF1-F           | AGACCTCGTGCCAAATTACATT  |
| CSF1-R           | AGGTGTCTCATAGAAAGTTCGGA |
| TTL-F            | CCTTCGTGGTACGCGATGAG    |
| TTL-R            | CAGCATCAGGTTGAATCTGGG   |
| CA5B-F           | TATGATCCCGGCTTAAAACCAC  |
| CA5B-R           | GGTAGTTGTGTTCCAGGGGTC   |
| OSGIN1-F         | CCCGGTCATCATTGTGGGTAA   |
| OSGIN1-R         | GCTTCGTGTAGGGTGTGTAGC   |
| STING1-F         | AGCATTACAACAACCTGCTACG  |
| STING1-R         | GTTGGGGTCAGCCATACTCAG   |
| PDPK1-F          | GGAACAGCGCAGTACGTTTCT   |
| PDPK1-R          | CTCGTTTCCAGCTCGGAATGG   |
| ULBP2-F          | AGCAACTGCGTGACATTCAG    |
| ULBP2-R          | GCCATCCTATACAGTCTCCCA   |
| ZNF292-F         | AGCTGTGCCAGACACTCCTA    |
| ZNF292-R         | CCAAGCGTTCAGAACCAAG     |
| EID3-F           | GGCGAACAACCTCCTTAACCGA  |
| EID3-R           | TCAGACCCACGAACAGAAACA   |
| GALNT4-F         | AAAAGTTGTGAGCCGAGCAG    |
| GALNT4-R         | CGAGCTCAGGTACTIONCCAG   |
| APOL1-F          | TGGACTACGGAAAGAAGTGGT   |
| APOL1-R          | CCTCCTTCAATTTGTCAAGGCTT |

|           |                         |
|-----------|-------------------------|
| PIK3R2-F  | TCACCTTCTGCTCCGTTGTG    |
| PIK3R2-R  | GGAGGTCCGTGTGTACTCTTC   |
| ERCC5-F   | CACCAAGCGCAGAAGAACATT   |
| ERCC5-R   | ACCACTCTCCTTGACTCTACCT  |
| SLC15A4-F | TGGGAGCGATCCTGTCGTTA    |
| SLC15A4-R | GGAAGACCACAAAAGCAAGGC   |
| SYTL4-F   | CAACACTACAGTGATCGGACC   |
| SYTL4-R   | ACAACCCCGACAAGTATTGGT   |
| OLR1-F    | TTGCCTGGGATTAGTAGTGACC  |
| OLR1-R    | GCTTGCTCTTGTGTTAGGAGGT  |
| GPRC5B-F  | CCTCCTCCCTCAGTACGTGTC   |
| GPRC5B-R  | AAGGCAAACGTCAGCCCAA     |
| MSMO1-F   | TGCTTTGGTTGTGCAGTCATT   |
| MSMO1-R   | GGATGTGCATATTCAGCTTCCA  |
| TNFAIP3-F | TCCTCAGGCTTTGTATTTGAGC  |
| TNFAIP3-R | TGTGTATCGGTGCATGGTTTTA  |
| PSMB8-F   | GGTCCTACATTAGTGCCTTACGG |
| PSMB8-R   | CGCAGATAGTACAGCCTGCATT  |
| TRAFD1-F  | TCTGGATTGCATCCCAACTCC   |
| TRAFD1-R  | GGGCTGTAATGTTCTTTGGT    |
| NEAT1-F   | GACCTCTCACCTACCCACCT    |
| NEAT1-R   | CTTGTACCCTCCCAGCGTTT    |

---
