# Supplementary figures and images for: METTL3 Promotes Lung Adenocarcinoma Tumorigenesis and Inhibits Ferroptosis by Stabilizing SLC7A11 m6A Modification
Source: Research Square preprint supplement (doi:10.21203/rs.3.rs-1085921/v1), 2021-11-23

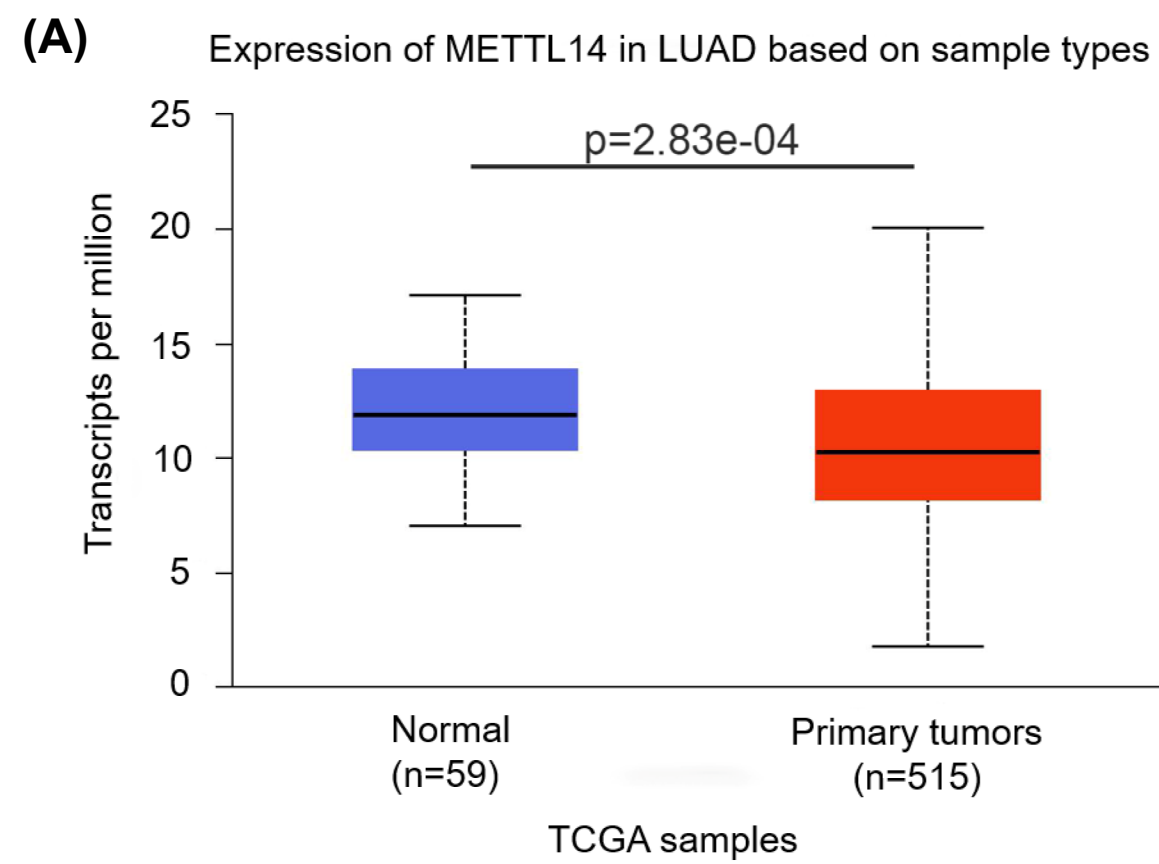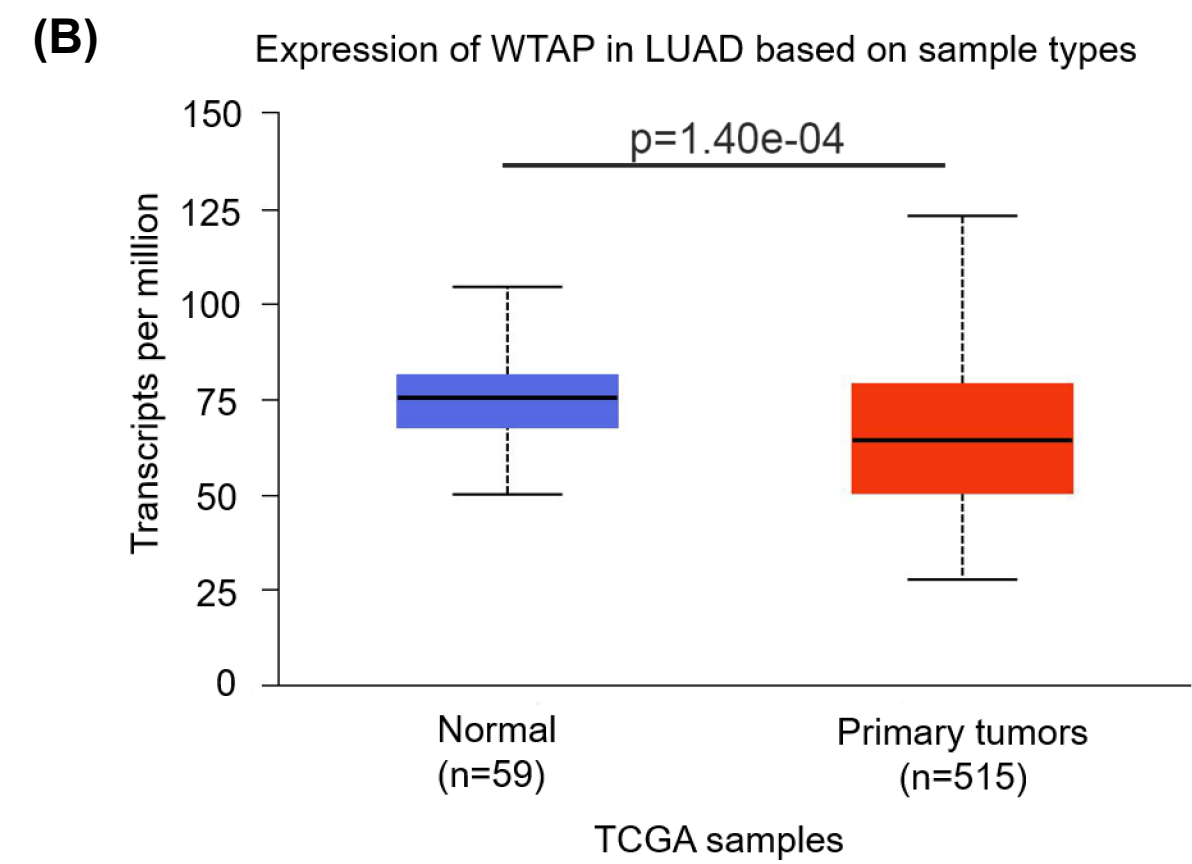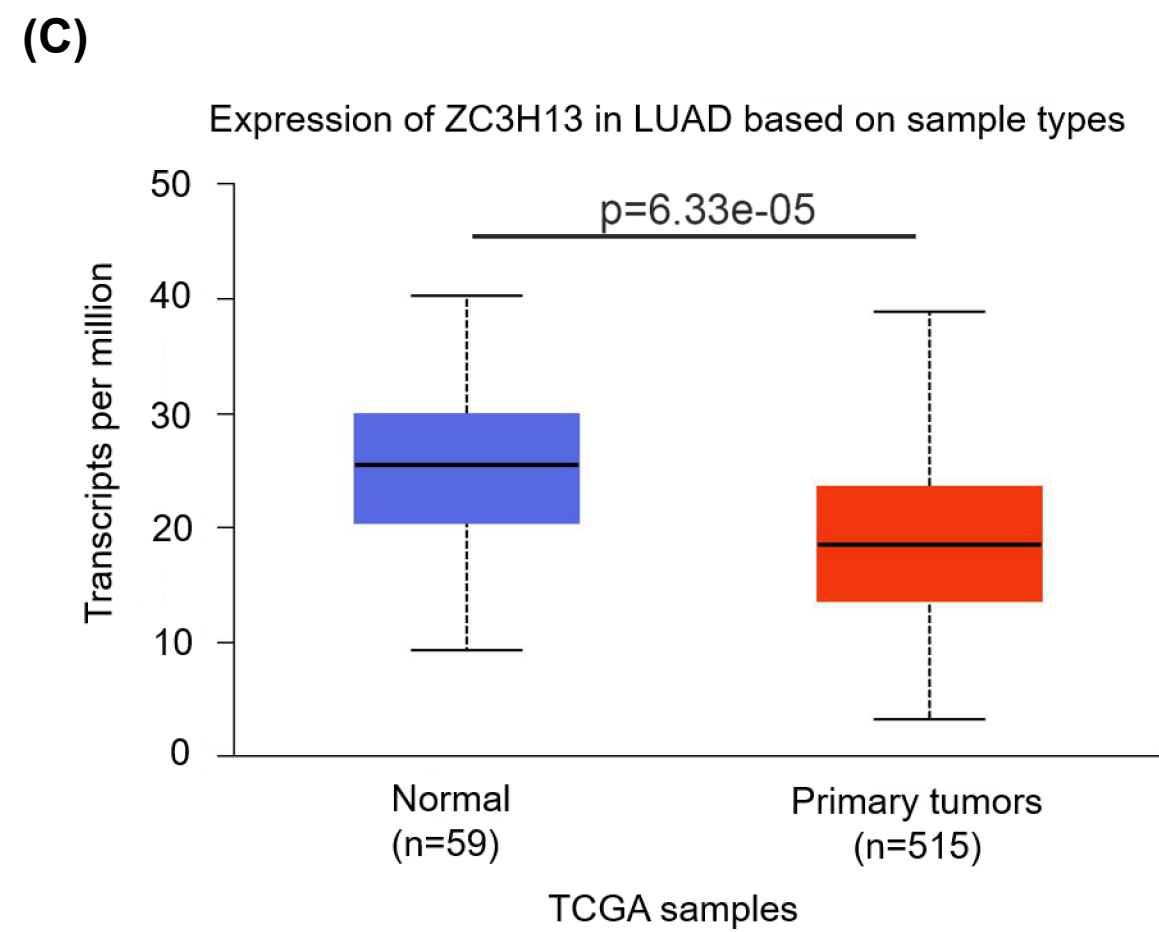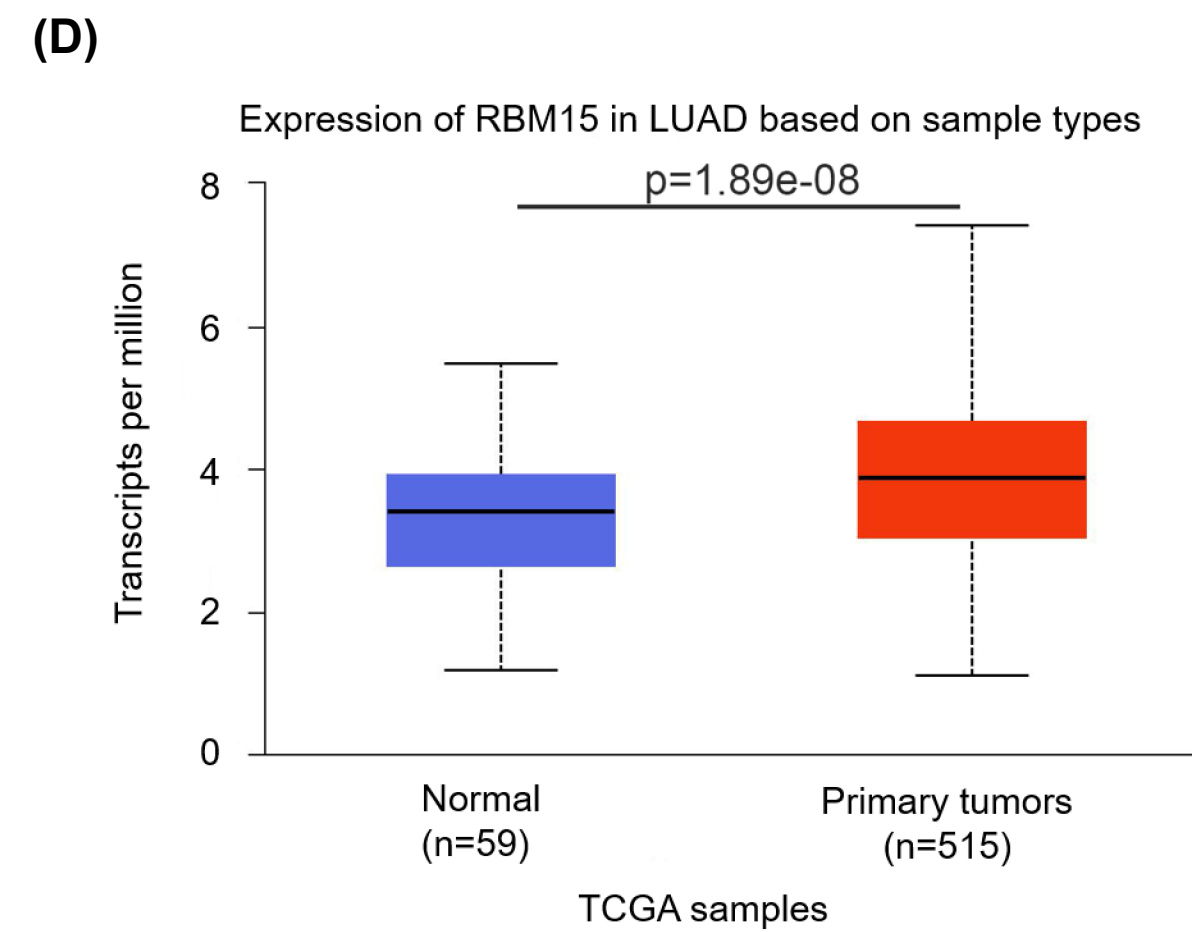

Supplement: Supplementary file 1 [file Figure S1.pdf › FigureS1/Figure S1.pdf]
